# Supplementary material
Source: PubMed Central journal article supplement (PMC6125893)

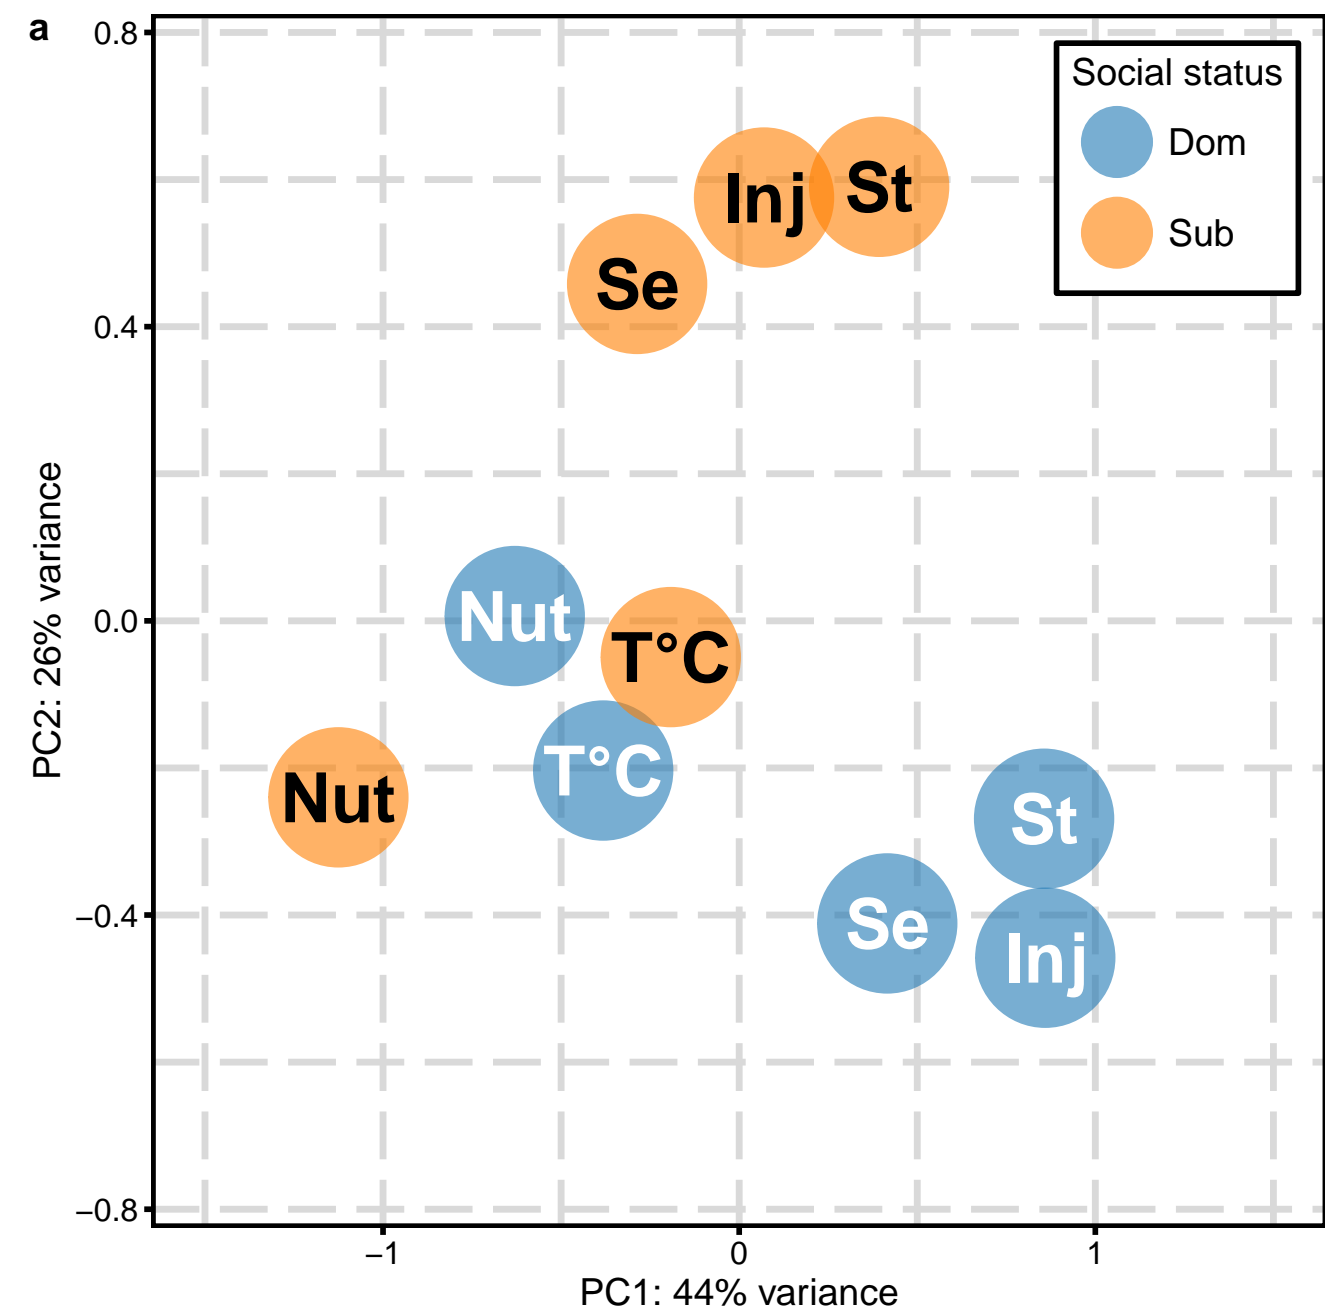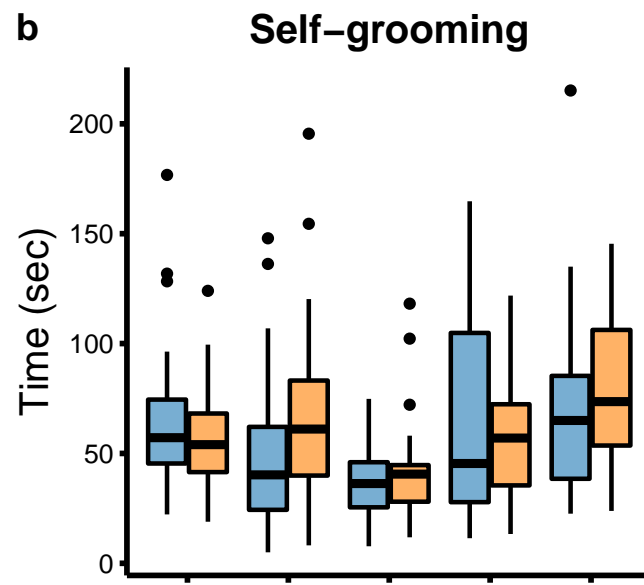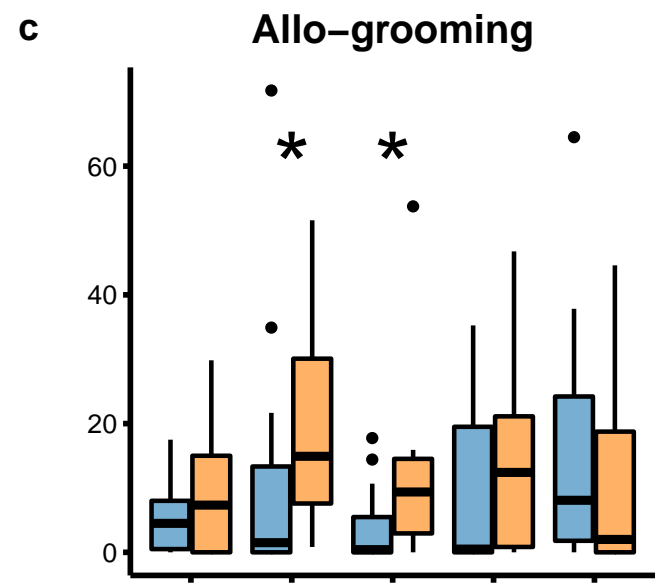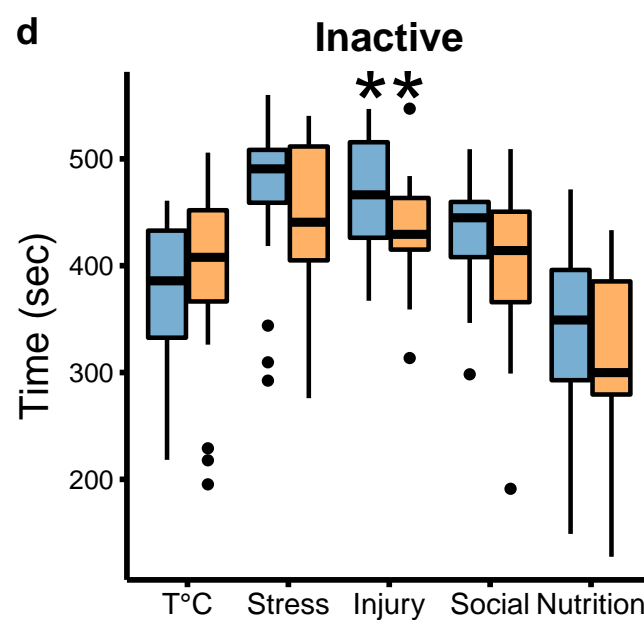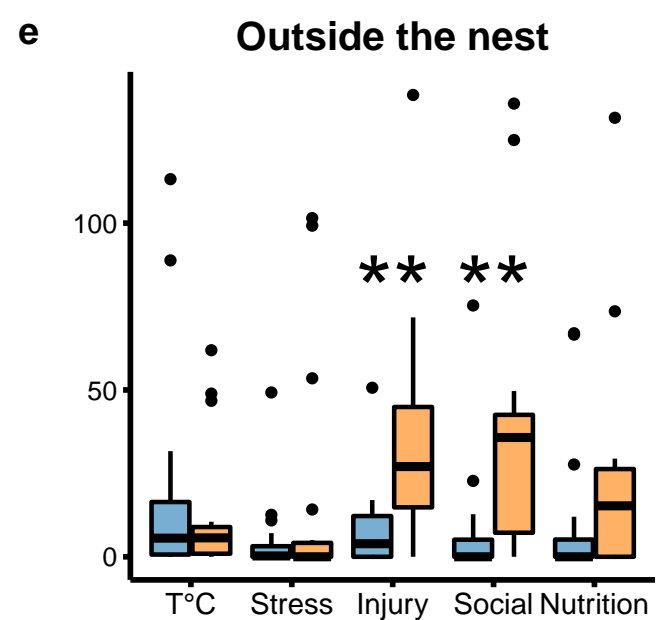

Supplement: rspb20181468supp2.pdf [file rspb20181468supp2.pdf]
